# Supplementary material
Source: Springer Nature journal article supplement (https://www.springermedizin.de/resource/supplementary/12889_2012_4171_MOESM3_ESM.pdf/9491442)
Supplement: MOESM3 [file 9491442]

**Table 3: Interview Guide**

| Q.                                                | Main Questions                                                   | Additional Questions                                                | Clarifying Questions / Prompts                                                       |
|---------------------------------------------------|------------------------------------------------------------------|---------------------------------------------------------------------|--------------------------------------------------------------------------------------|
| <b>Theme: Organizational Identity and Network</b> |                                                                  |                                                                     |                                                                                      |
| 1.                                                | Describe your organization, its mandate, and responsibilities    | -                                                                   |                                                                                      |
| 2.                                                | Who (what population/community) is the focus of your activities? |                                                                     |                                                                                      |
| 3.                                                | Is there a larger system that your community is a part of?       | How does the work of your organization fit into this larger system? | <i>(Prompt: What are the links? How do they connect in a public health context?)</i> |
| 4.                                                | Who are the stakeholders in your community?                      | How do you identify these stakeholders?                             |                                                                                      |
| 5.                                                | Are there unique or marginalized groups within your community?   |                                                                     |                                                                                      |
| 6.                                                | Are they represented in your programming? Why or why not?        |                                                                     |                                                                                      |

|                                                  |                                                                      |                                                                                                               |                                                                                                                                                                          |
|--------------------------------------------------|----------------------------------------------------------------------|---------------------------------------------------------------------------------------------------------------|--------------------------------------------------------------------------------------------------------------------------------------------------------------------------|
|                                                  |                                                                      |                                                                                                               |                                                                                                                                                                          |
| 7.                                               | How does your organization work with stakeholders?                   | Are stakeholders directly involved with any aspect of your work?                                              | <i>(Prompt: eg. Communicate with them, more direct involvement .... program development, conducting research/running programs, analysis/evaluation or dissemination)</i> |
| 8.                                               | Are your stakeholders directly represented within your organization? | If so, how?                                                                                                   | <i>(Prompt: structurally (eg. peer researchers, board membership, etc.) or through your programs (directly engage stakeholders, represent interests)?</i>                |
| 9.                                               | Are there any barriers to working with stakeholders?                 | How does your organization try to overcome these barriers?                                                    |                                                                                                                                                                          |
| <b>Theme: Human Health &amp; The Environment</b> |                                                                      |                                                                                                               |                                                                                                                                                                          |
| 10.                                              | How do you define "health"?                                          | How do you define "health" in your community?<br><br>Are there other definitions of health in your community? | -                                                                                                                                                                        |
| 11.                                              | How do you define the environment of your                            | (What are) Are there links                                                                                    |                                                                                                                                                                          |

|     |                                                                                                     |                                                            |  |
|-----|-----------------------------------------------------------------------------------------------------|------------------------------------------------------------|--|
|     | community?                                                                                          | between your community and the environment?                |  |
| 12. | Do you believe that the health of your community is linked to its environment?                      | If so, how?<br><br>Is this reflected in your programming?  |  |
| 13. | How do you define a “healthy” environment?                                                          |                                                            |  |
| 14. | Do you believe that the health of your community is linked to <u>the health</u> of its environment? | If so, how?                                                |  |
| 15. | Is this reflected in your programming?                                                              | Why or why not? If not, what are the barriers to doing so? |  |
| 16. | How do you measure health (of your community and the environment)?                                  |                                                            |  |

|     |                                                                                                                                                                |                    |                                                      |
|-----|----------------------------------------------------------------------------------------------------------------------------------------------------------------|--------------------|------------------------------------------------------|
| 17. | How do you know if you've improved the health of your community?                                                                                               | Their environment? |                                                      |
| 18. | Are your perspectives on the connection between environment and the health of your community, shared by your partners?                                         | Your community?    |                                                      |
| 19. | If so, how are your programs/policies supported by your partners? By your community?                                                                           |                    |                                                      |
| 20. | If not, what are the barriers towards a shared understanding?                                                                                                  |                    | Prompt: Can you elaborate or give specific examples? |
| 21. | In the context of the health and the environment, is there an individual / policy / program / organization that has shaped the practices of your organization? |                    |                                                      |
| 22. | Can you identify a model of good public health practice with respect to health and the environment?                                                            |                    |                                                      |

**Theme: Organizational Working Practices**

|     |                                                                                                                                                                               |                                                                          |                                                                                                  |
|-----|-------------------------------------------------------------------------------------------------------------------------------------------------------------------------------|--------------------------------------------------------------------------|--------------------------------------------------------------------------------------------------|
| 23. | How are public health problems first identified by your organization?                                                                                                         | How are they prioritized?                                                |                                                                                                  |
| 24. | When developing your programs and policies, what types of evidence do you collect?                                                                                            | How do you collect this evidence?<br><br>How do you prioritize evidence? | <i>(Prompt: Scientific – formal lit, expert-driven, community level, local or individual)</i>    |
| 25. | What are the challenges to integrating evidence into your programming?                                                                                                        |                                                                          |                                                                                                  |
| 26. | Who is involved in developing programs and policies?                                                                                                                          |                                                                          | <i>(Prompt: Individuals? A team approach? If a team, who would typically make up this team?)</i> |
| 27. | Do team members have different perspectives on the links between human health and the environment? Do you incorporate perspectives from outside the organization? If so, how? |                                                                          | <i>(Prompt: from individuals, from the community, other groups)</i>                              |
| 28. | How do you reconcile conflicting perspectives or pieces of evidence?                                                                                                          |                                                                          |                                                                                                  |

|     |                                                                                            |  |                                                      |
|-----|--------------------------------------------------------------------------------------------|--|------------------------------------------------------|
|     |                                                                                            |  |                                                      |
| 29. | How do you disseminate or share your work? With whom is your work shared?                  |  |                                                      |
| 30. | Are your programs and policies adaptive? If so, how?                                       |  | <i>(Prompt: responsive to changing environments)</i> |
| 31. | At what scale (temporal or spatial or otherwise) are your policies and programs developed? |  |                                                      |
